# Supplementary material for: Survey on Adsorption of Low Molecular Weight Compounds in Cu-BTC Metal–Organic Framework: Experimental Results and Thermodynamic Modeling
Source: MDPI journal article supplement (doi:10.3390/ijms23169406), 2022-08-20
Supplement: s1 [file s1]

## ***Supplementary materials***

### ***Survey on adsorption of low molecular weight compounds in Cu-BTC Metal-Organic-Framework: experimental results and thermodynamic modelling***

*Antonio Baldanza, Domenico Mallamace, Giuseppe Mensitieri, Cosimo Brondi, Pellegrino Musto and Giuseppe Scherillo*

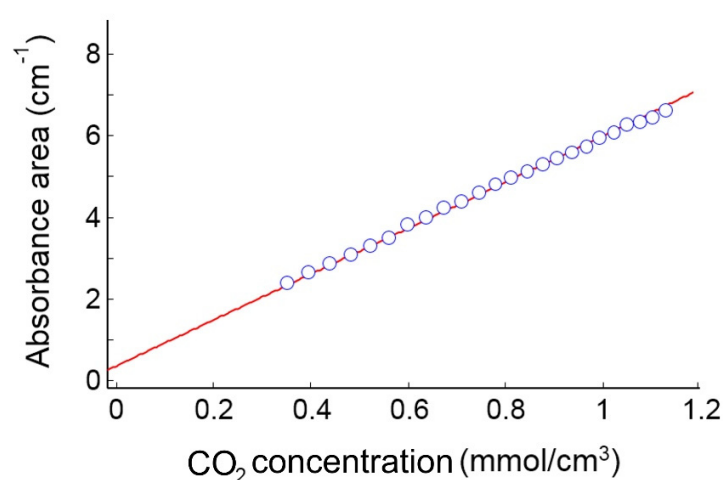

**Figure S1.** Correlation between spectroscopic and volumetric data relative to a CO<sub>2</sub> sorption isotherm at 35°C.

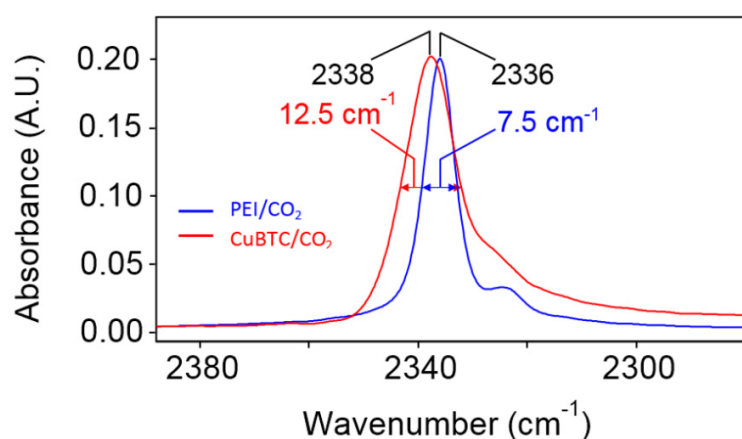

**Figure S2.** Bandshape of CO<sub>2</sub> sorbed in polyetherimide (PEI) and in CuBTC. Normalization with respect to the PEI system has been made to facilitate the comparison.

**Table S1.** Optimized fitting parameters of RALF model

|                         |         |
|-------------------------|---------|
| $T_s^*$ (K)             | 986     |
| $P_s^*$ (MPa)           | 2754    |
| $k_{CO_2-S}$            | 0.2571  |
| $k_{CH_4-S}$            | 0.1758  |
| $k_{N_2-S}$             | 0.1287  |
| $k_{O_2-S}$             | 0.3607  |
| $k_{CH_3OH-S}^I$        | -0.0071 |
| $k_{CH_3OH-S}^{II}$     | 0.3210  |
| $\zeta_{CO_2-S}$        | 0.3151  |
| $\zeta_{CH_4-S}$        | 0.6088  |
| $\zeta_{N_2-S}$         | 0.4077  |
| $\zeta_{O_2-S}$         | 0.0731  |
| $\zeta_{CH_3OH-S}^I$    | 0.0002  |
| $\zeta_{CH_3OH-S}^{II}$ | 0.0031  |
| $\omega_I$              | 0.5467  |
| $f_{V,I}$               | 0.6437  |

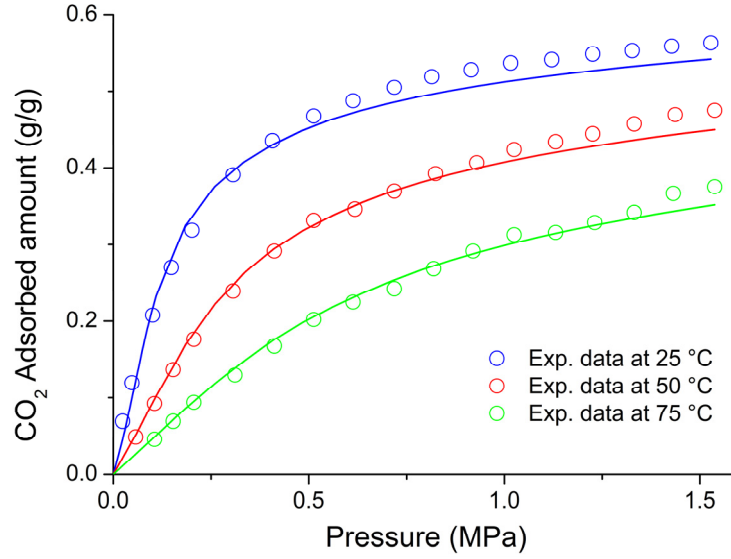**Figure S3.** Comparison between experimental data and simultaneous optimized model fitting (solid lines).

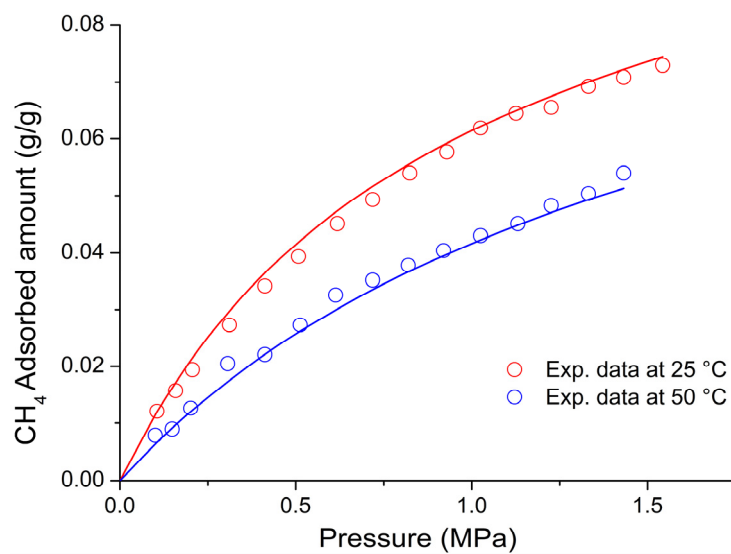

**Figure S4.** Comparison between experimental data and simultaneous optimized model fitting (solid lines).

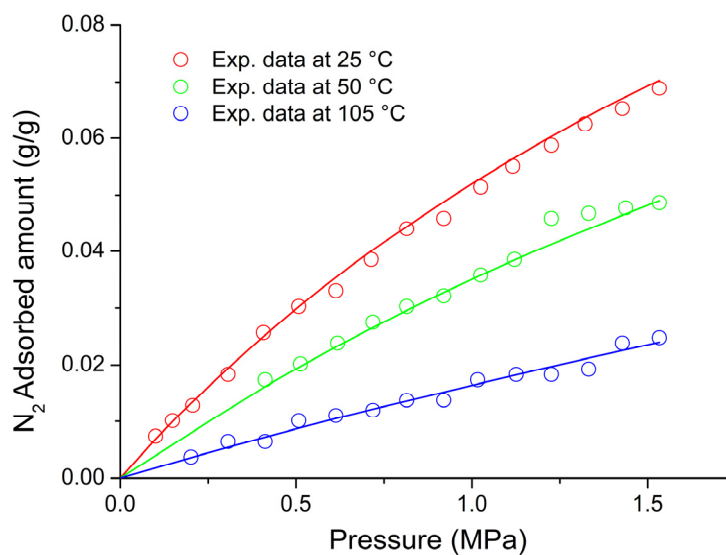

**Figure S5.** Comparison between experimental data and simultaneous optimized model fitting (solid lines).

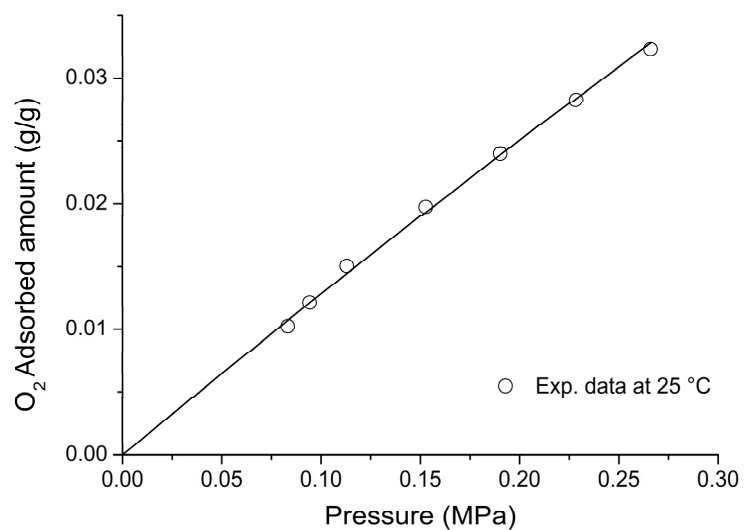

**Figure S6.** Comparison between experimental data and simultaneous optimized model fitting (solid lines).

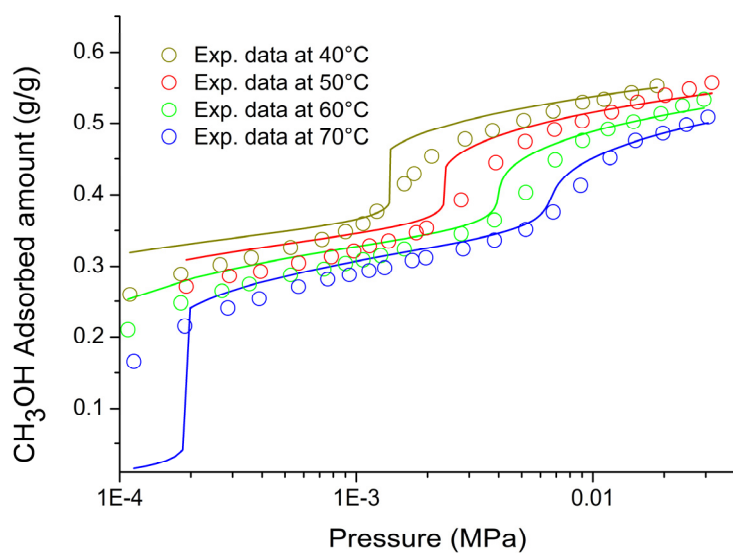

**Figure S7.** Comparison between experimental data and simultaneous optimized model fitting (solid lines).
